# Supplementary material
Source: publisher figshare collection journal article supplement (https://acs.figshare.com/ndownloader/files/5679189)

## Supporting Information

### Temperature programmed desorption technique

Temperature Programmed Desorption (TPD) technique was used to measure the extent of acidic sites in a set up locally fabricated. In TPD we are determining the amount of ammonia desorbed from a catalyst saturated with ammonia using volumetric titration method. In a typical experiment, the stepwise determination of the amount of acidic sites is carrying out by programming the temperature of the catalyst from 100 to 700° C. After degassing in presence of a carrier gas at 300° C, the sample is allowed to cool to room temperature. A measured quantity of ammonia gas (excess) is then injected to an accurately weighed quantity of a catalyst, which is made into a pellet form, kept in the reactor. In the course of temperature programming, the sample is being kept at each temperature such as 100, 200, 300, 400, 500, 600 and 700° C for a constant period of time. This is to allow the sample to react at that temperature, and the desorbed ammonia gas is then collected in a standardized H<sub>2</sub>SO<sub>4</sub> solution kept in a conical flask. This solution is further used for the volumetric determination of the amount of ammonia desorbed by the catalyst. The calculation is as follows.

### Undoped titania, 300° C

|                                             |           |
|---------------------------------------------|-----------|
| Wt of catalyst, w                           | = 1.041g  |
| Normality of NaOH                           | = 0.0252N |
| Normality of H <sub>2</sub> SO <sub>4</sub> | = 0.051N  |

### Standardization of H<sub>2</sub>SO<sub>4</sub>

$$10 \text{ ml H}_2\text{SO}_4 = 20.25 \text{ ml NaOH}$$

| Volume of NaOH (ml) | $\Delta V$ (ml) | Amount of ammonia desorbed                                |
|---------------------|-----------------|-----------------------------------------------------------|
| at temperatures, °C |                 | $= (N_{\text{NaOH}} \times V) \times 17/w \text{ (mg/g)}$ |
| 100                 | 19.45           | 0.8                                                       |
| 200                 | 19.65           | 0.6                                                       |
| 300                 | 19.85           | 0.4                                                       |
| 400                 | 19.95           | 0.3                                                       |
| 500                 | 19.95           | 0.3                                                       |
| 600                 | 19.9            | 0.35                                                      |
| 700                 | 19.85           | 0.4                                                       |

#### Undoped titania, 700° C

|                                             |           |
|---------------------------------------------|-----------|
| Wt of catalyst, w                           | = 0.971g  |
| Normality of NaOH                           | = 0.0258N |
| Normality of H <sub>2</sub> SO <sub>4</sub> | = 0.0521N |

$$10 \text{ ml H}_2\text{SO}_4 = 20.2 \text{ ml NaOH}$$

| Volume of NaOH (ml) | $\Delta V$ (ml) | Amount of ammonia desorbed                                |
|---------------------|-----------------|-----------------------------------------------------------|
| at temperatures, °C |                 | $= (N_{\text{NaOH}} \times V) \times 17/w \text{ (mg/g)}$ |
| 100                 | 16.05           | 4.15                                                      |

|     |       |      |      |
|-----|-------|------|------|
| 200 | 17.2  | 3.0  | 1.36 |
| 300 | 18.8  | 1.4  | 0.63 |
| 400 | 19.55 | 0.65 | 0.29 |
| 500 | 19.6  | 0.6  | 0.27 |
| 600 | 19.5  | 0.7  | 0.31 |
| 700 | 19.45 | 0.75 | 0.34 |

**1% lanthana-titania, 300° C**

|                                             |           |
|---------------------------------------------|-----------|
| Wt of catalyst, w                           | = 1.02g   |
| Normality of NaOH                           | = 0.024N  |
| Normality of H <sub>2</sub> SO <sub>4</sub> | = 0.0511N |

$$10 \text{ ml H}_2\text{SO}_4 = 21.3 \text{ ml NaOH}$$

| Volume of NaOH (ml) | $\Delta V$ (ml) | Amount of ammonia desorbed                                |      |
|---------------------|-----------------|-----------------------------------------------------------|------|
| at temperatures, °C |                 | $= (N_{\text{NaOH}} \times V) \times 17/w \text{ (mg/g)}$ |      |
| 100                 | 19.65           | 1.65                                                      | 0.66 |
| 200                 | 19.7            | 1.6                                                       | 0.64 |
| 300                 | 19.9            | 1.4                                                       | 0.56 |
| 400                 | 20.6            | 0.7                                                       | 0.28 |
| 500                 | 20.55           | 0.75                                                      | 0.30 |
| 600                 | 20.35           | 0.95                                                      | 0.38 |
| 700                 | 20.45           | 0.85                                                      | 0.34 |

**1% lanthana-titania, 700° C**

Wt of catalyst, w = 1.016g

Normality of NaOH = 0.025N

Normality of H<sub>2</sub>SO<sub>4</sub> = 0.053N10 ml H<sub>2</sub>SO<sub>4</sub> = 21.2 ml NaOH

---

| Volume of NaOH (ml) | $\Delta V$ (ml) | Amount of ammonia desorbed<br>at temperatures, °C | $= (N_{\text{NaOH}} \times V) \times 17/w \text{ (mg/g)}$ |
|---------------------|-----------------|---------------------------------------------------|-----------------------------------------------------------|
| 100                 | 17.5            | 3.7                                               | 1.548                                                     |
| 200                 | 17.95           | 3.25                                              | 1.359                                                     |
| 300                 | 19.25           | 1.95                                              | 0.82                                                      |
| 400                 | 19.4            | 1.8                                               | 0.75                                                      |
| 500                 | 19.65           | 1.55                                              | 0.65                                                      |
| 600                 | 19.4            | 1.8                                               | 0.75                                                      |
| 700                 | 19.4            | 1.8                                               | 0.75                                                      |

---

**2% lanthana-titania, 700° C**

Wt of catalyst, w = 1.019g

Normality of NaOH = 0.0258N

Normality of H<sub>2</sub>SO<sub>4</sub> = 0.0503N10 ml H<sub>2</sub>SO<sub>4</sub> = 19.5 ml NaOH

| Volume of NaOH (ml)<br>at temperatures, °C |       | $\Delta V$ (ml) | Amount of ammonia desorbed<br>$= (N_{\text{NaOH}} \times V) \times 17/w$ (mg/g) |
|--------------------------------------------|-------|-----------------|---------------------------------------------------------------------------------|
| 100                                        | 15.1  | 4.4             | 1.72                                                                            |
| 200                                        | 15.5  | 4.0             | 1.89                                                                            |
| 300                                        | 15.55 | 3.95            | 1.70                                                                            |
| 400                                        | 17.15 | 2.35            | 1.01                                                                            |
| 500                                        | 17.35 | 2.15            | 0.92                                                                            |
| 600                                        | 16.8  | 2.7             | 1.16                                                                            |
| 700                                        | 19.3  | 2.0             | 0.86                                                                            |

### The proposing $\text{La}^{3+}$ site formation

Pure titania possesses terminal surface hydroxy-groups<sup>33b</sup>, but they are non acidic, and this surface is catalytically unimportant. According to Pauling, the acidity of a catalyst can be tailored by adding cations with a different valence state to a host oxide. In our case, let a trivalent  $\text{La}^{3+}$  cation substitutes for a tetravalent  $\text{Ti}^{4+}$  cation in  $\text{TiO}_2$ , in such a way that it occupies a tetrahedral Ti site. A net negative charge is then created which must be balanced by a nearby positive charge. This can be an  $\text{H}^+$  cation from water molecules, which dissociates to fix a hydroxyl OH on the  $\text{La}^{3+}$  cation. So this can behave as a Bronsted acid and can give up a proton according to the reaction given below (Scheme I) or it may transform to a Lewis acid by losing a water molecule according to reaction (Scheme II)

*Structural modifications and associated**Sibu et al**Scheme 1 & II*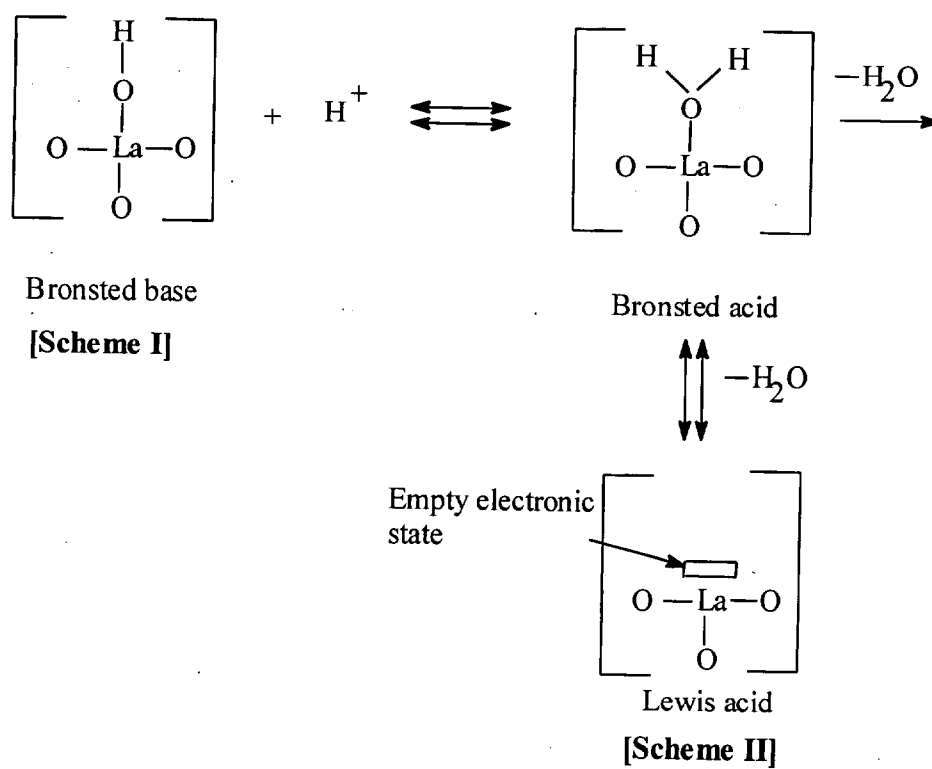

Supplement: Supplementary file 1 [file 5679189]
